# Supplementary material for: Parkinson’s Progression Markers Initiative: A Milestone-Based Strategy to Monitor PD Progression
Source: bioRxiv or medRxiv preprint supplement (doi:10.1101/2023.05.23.23290344), 2023-05-24

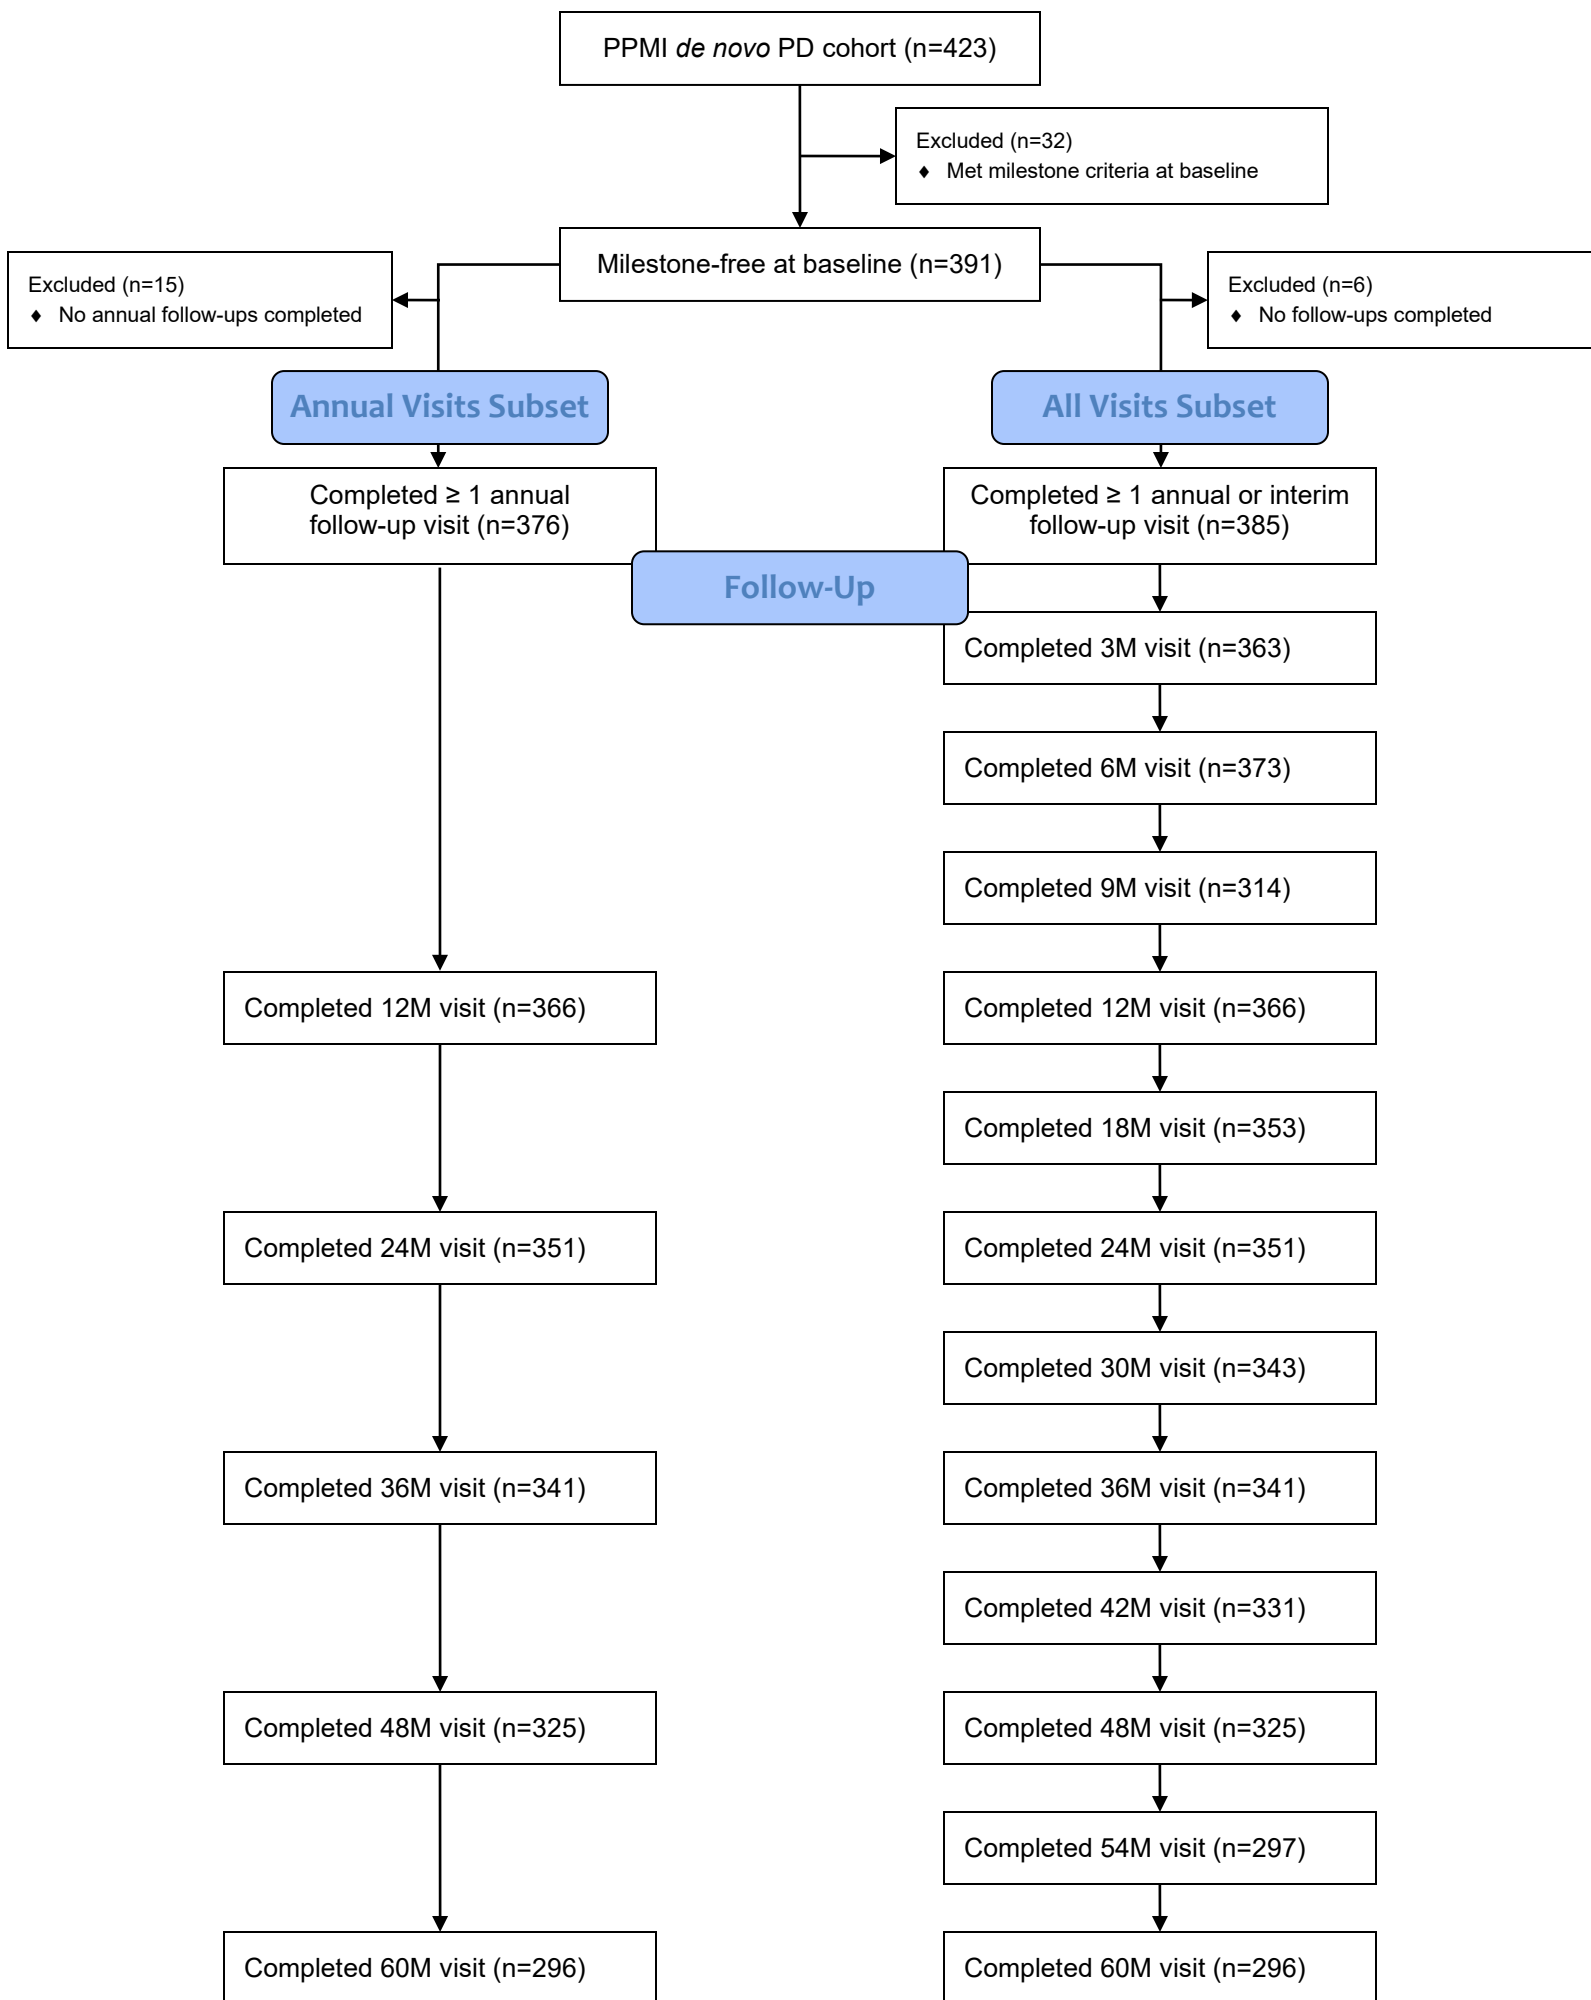

Supplement: Supplementary file [file media-4.pdf]
